# Supplementary material for: Robust Electrospinning-Constructed Cellulose Acetate@Anthocyanin Ultrafine Fibers: Synthesis, Characterization, and Controlled Release Properties
Source: MDPI journal article supplement (doi:10.3390/polym14194036), 2022-09-27
Supplement: s1 [file s1]

# Robust Electrospinning-Constructed Cellulose Acetate@Anthocyanin Ultrafine Fibers: Synthesis, Characterization, and Controlled Release Properties

Mingzhu Liu<sup>1,2</sup>, Shilei Zhang<sup>2</sup>, Yuanyuan Ye<sup>1,2</sup>, Xiaoqing Liu<sup>1,2</sup>, Jiangling He<sup>1,\*</sup>, Lingfeng Wei<sup>1,2</sup>, Die Zhang<sup>2</sup>, Jiaojiao Zhou<sup>1</sup> and Jie Cai<sup>2,\*</sup>

<sup>1</sup> National R&D Center for Se-rich Agricultural Products Processing, Hubei Engineering Research Center for Deep Processing of Green Se-rich Agricultural Products, School of Modern Industry for Selenium Science and Engineering, Wuhan Polytechnic University, Wuhan 430023, China

<sup>2</sup> Key Laboratory for Deep Processing of Major Grain and Oil, Ministry of Education, Hubei Key Laboratory for Processing and Transformation of Agricultural Products, Wuhan Polytechnic University, Wuhan 430023, China

\* Correspondence: hejiangling@whpu.edu.cn (J.H.); caijievip@whpu.edu.cn (J.C.)

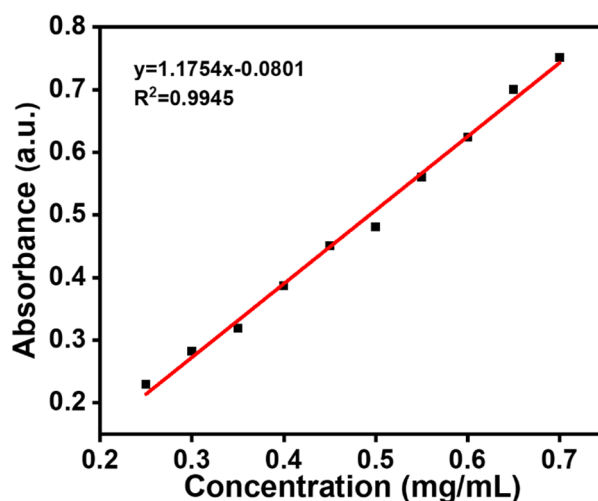

Figure S1. Standard curve of anthocyanin aqueous solution with various concentrations.

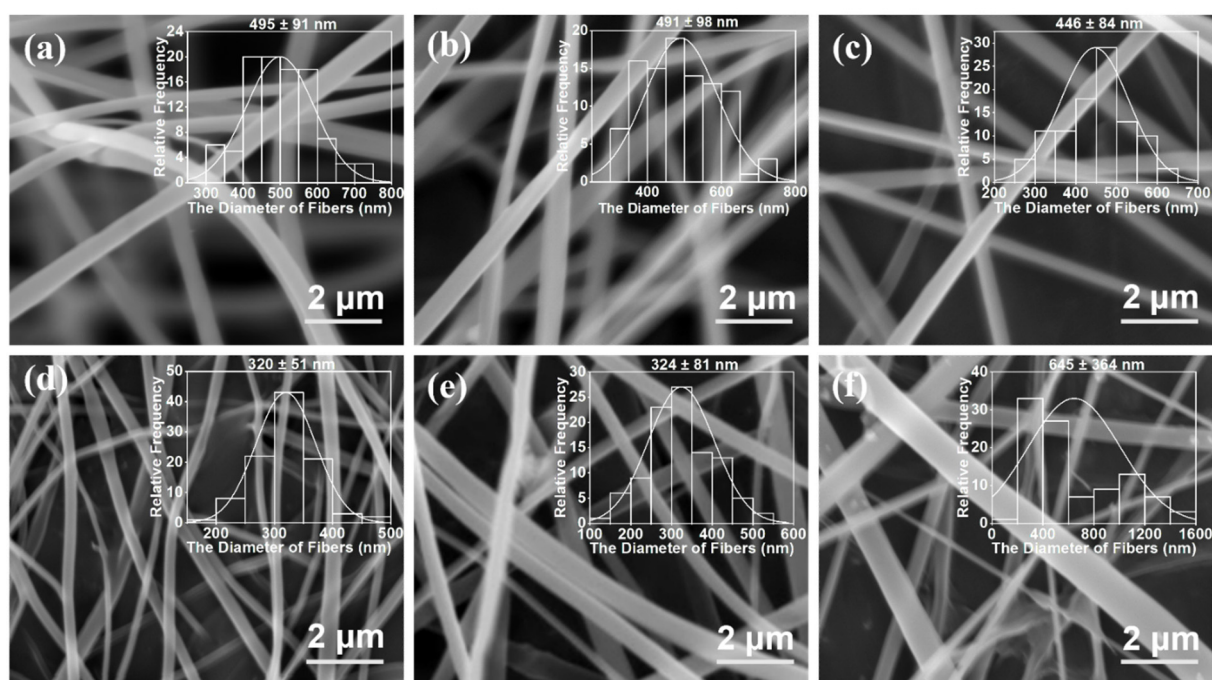

**Figure S2.** (a–f) SEM images of CA@Anthocyanin UF membranes with various concentrations of anthocyanin (a–0%, b–3%, c–5%, d–7%, e–9%, f–11%). Inset: diameter distribution of CA@Anthocyanin UF membranes; a–0%, b–3%, c–5%, d–7%, e–9%, f–11%.

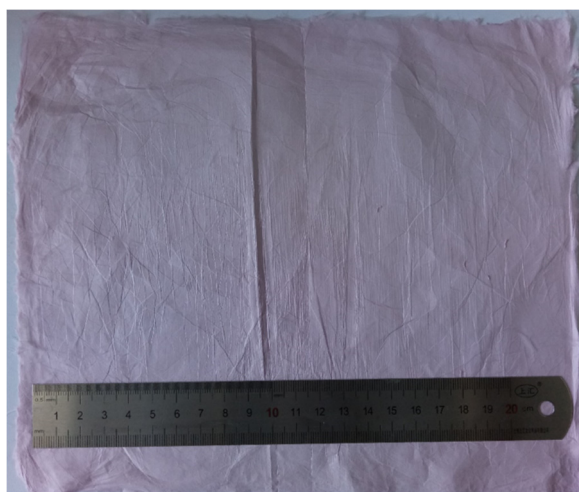

**Figure S3.** The captured photo of the CA@Anthocyanin UFs under room light (7 wt.%).

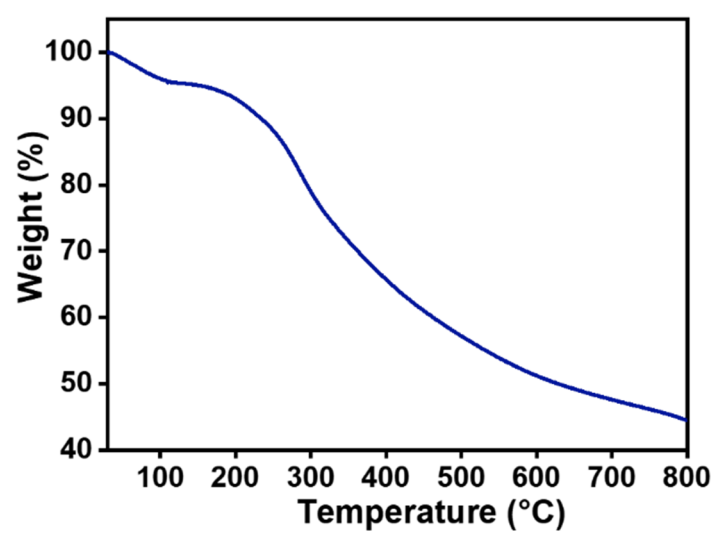

Figure S4. TGA curve of anthocyanin.

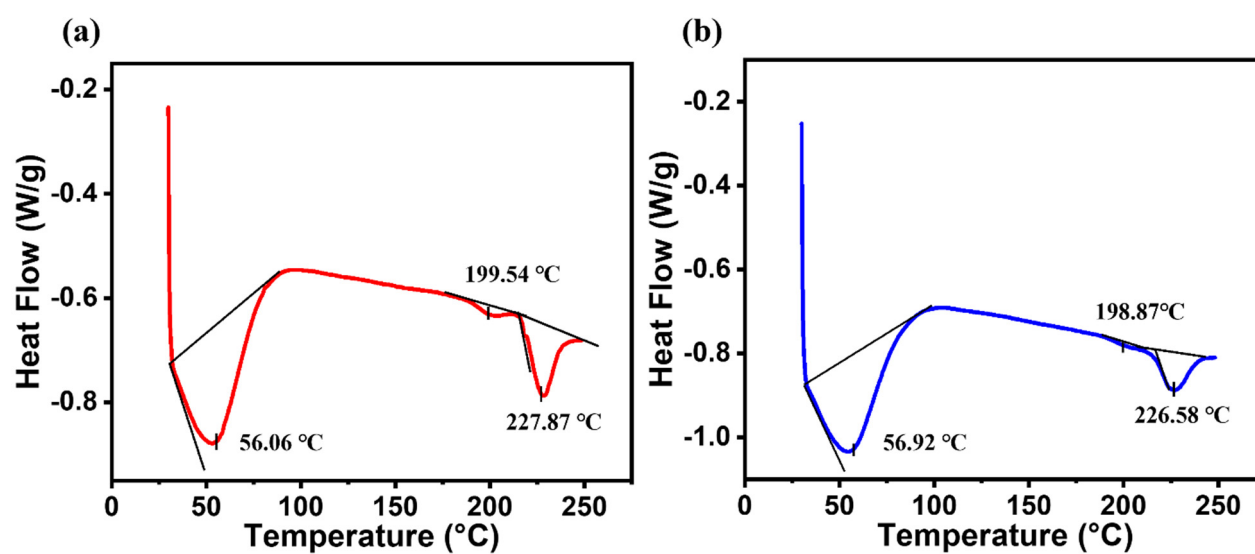

Figure S5. DSC curves of (a) CA UFs and (b) CA@Anthocyanin UFs.

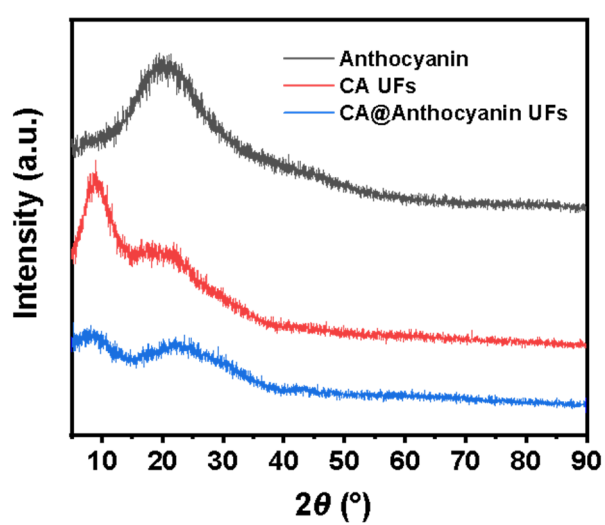

**Figure S6.** XRD patterns of anthocyanin, CA UFs, and CA@Anthocyanin UFs.

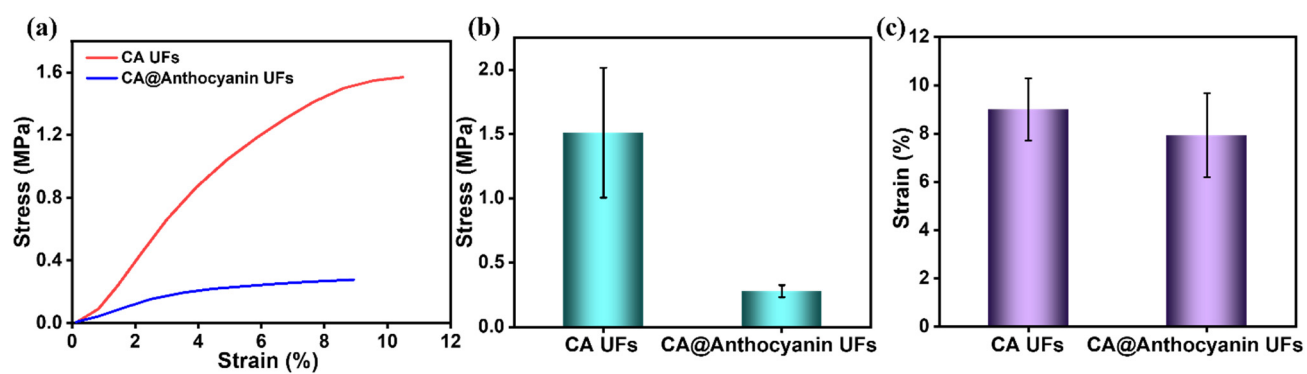

Figure S7. (a) Typical stress-strain curves; (b) tensile strength; (c) elongation at break of CA UF and CA@Anthocyanin UF.

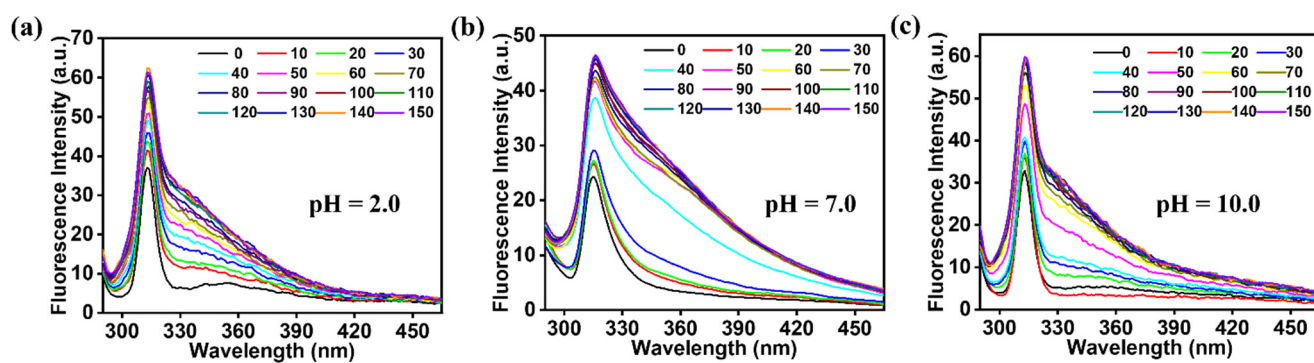

**Figure S8.** Fluorescence spectra of CA@Anthocyanin UFs in the citric acid/sodium citrate buffer solution with different pH values gathered with time interval of 10 min (0-150 min).



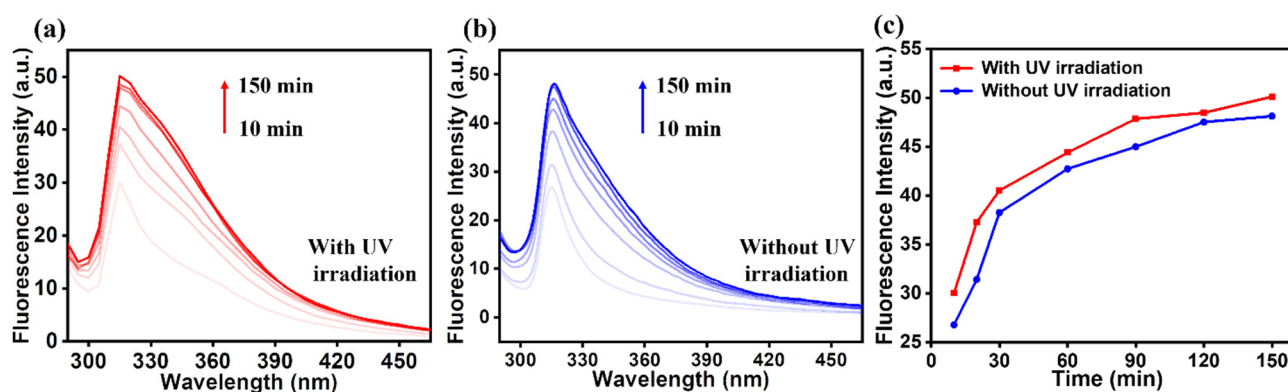

**Figure S9.** (a) and (b) Fluorescence spectra of CA@Anthocyanin UFs in water with/without UV irradiation (10, 20, 30, 60, 90, 120, and 150 min), respectively; (c) comparison of the fluorescence intensity of CA@Anthocyanin UFs with/without UV irradiation at different times (10, 20, 30, 60, 90, 120, and 150 min).
